# Supplementary material for: Dimerisation induced formation of the active site and the identification of three metal sites in EAL-phosphodiesterases
Source: PubMed Central journal article supplement (PMC5301497; doi:10.1038/srep42166), 2017-02-10
Supplement: srep42166-s1.pdf [file srep42166-s1.pdf]

## SUPPLEMENT TO

### **Dimerisation induced formation of the active site and the identification of three metal sites in EAL-phosphodiesterases**

Dom Bellini<sup>a,b\*</sup>, Sam Horrell<sup>a,c\*</sup>, Andrew Hutchin<sup>a,d\*</sup>, Curtis W. Phippen<sup>d</sup>, Richard W. Strange<sup>c</sup>, Yuming Cai<sup>d</sup>, Armin Wagner<sup>a</sup>, Jeremy S. Webb<sup>d</sup>, Ivo Tews<sup>d</sup>, and Martin A. Walsh<sup>a,b</sup>

<sup>a</sup>Diamond Light Source, Harwell Science and Innovation Campus, Didcot, Oxfordshire, OX11 0DE, United Kingdom.

<sup>b</sup>Research Complex at Harwell, Harwell Science and Innovation Campus, Didcot, Oxfordshire, OX11 0DE, United Kingdom

<sup>c</sup>School of Biological Sciences, University of Essex, Wivenhoe Park, Colchester, CO4 3SQ, Essex, United Kingdom

<sup>d</sup>Centre for Biological Sciences and Institute for Life Sciences, Life Sciences Building B85, The University of Southampton, University Rd, Southampton, Hampshire, SO17 1BJ, United Kingdom

\*Joint first authors

#### **Corresponding authors:**

Martin A. Walsh, E-mail: [martin.walsh@diamond.ac.uk](mailto:martin.walsh@diamond.ac.uk) tel:+44 1235778518

[Ivo Tews](mailto:Ivo.Tews@soton.ac.uk), E-mail: [Ivo.Tews@soton.ac.uk](mailto:Ivo.Tews@soton.ac.uk) tel:+44 2380594415

Table S1. Primers used in this study

| Primer                 | Sequence (5' → 3')               |
|------------------------|----------------------------------|
| <i>mucR</i> deletion   |                                  |
| PA1727-up-F            | ATGCCCCGGGCCATCCTGGCGTCCTACAC    |
| PA1727-up-R            | ATGCGAATTCAGCCACAGCGGGTTCG       |
| PA1727-dn-F            | ATGCAAGCTTGCTGGAGCCCAGCC         |
| PA1727-dn-R            | ATGCCCCGGGTCAGGCGACGCTGGC        |
| <i>pa3825</i> deletion |                                  |
| PA3825-up-F            | ATGCCCCGGGATTCCGGTGAAGCGAGC      |
| PA3825-up-R            | ATGCGAATTCATCAGCAAGAGGGCGTC      |
| PA3825-dn-F            | ATGCAAGCTTAATTGCATGCCCTGGG       |
| PA3825-dn-R            | ATGCCCCGGGAAGTGCGACGACGGAAG      |
| Gm cassette            |                                  |
| Gm-F                   | ATGCGAATTCGAATTGACATAAGCCTGTTCGG |
| Gm-R                   | ATGCAAGCTTGAATTGGCCGCGG          |

Table S2. Strains and plasmids used in this study

| Strains or plasmid    | Genotype or phenotypes <sup>a</sup>                                              | Source or reference          |
|-----------------------|----------------------------------------------------------------------------------|------------------------------|
| <i>P.aeruginosa</i>   |                                                                                  |                              |
| PAO1                  | Wild-Type                                                                        | (Holloway, 1969)             |
| $\Delta MucR::PAO1$   | <i>mucR::Gm</i>                                                                  | This study                   |
| $\Delta PA3825::PAO1$ | <i>pa3825::Gm</i>                                                                | This study                   |
| <i>E.coli</i>         |                                                                                  |                              |
| S17-1( $\lambda$ pir) | TpR SmR recA, thi, pro, hsdR-M+RP4: 2-Tc:Mu: Km Tn7                              | Biomedal corp.               |
| Plasmid               |                                                                                  |                              |
| pPS856                | Ap <sup>R</sup> , Gm <sup>R</sup> ; 0.83-kb blunt-ended SmaI fragment from pUCGM | (Hoang <i>et al.</i> , 1998) |
| pEX100T               | Ap <sup>R</sup> ; oriT <sup>+</sup> sacB <sup>+</sup> gene replacement vector    | (Hoang <i>et al.</i> , 1998) |

<sup>a</sup> Ap<sup>R</sup>, ampicillin resistance; sacB<sup>+</sup>, sucrose sensitive; Gm<sup>R</sup>, gentamicin resistance

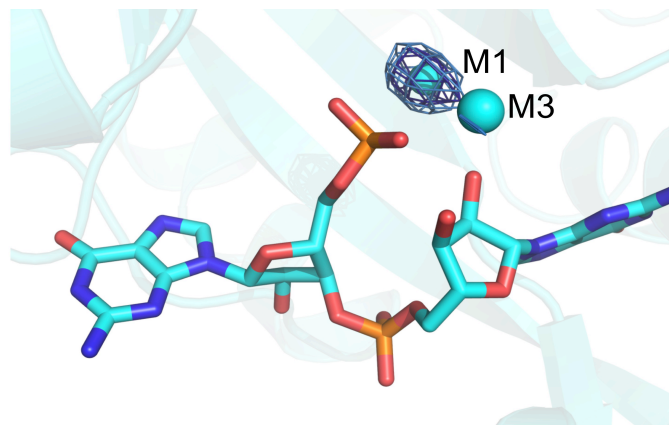

Fig. S1. Anomalous difference map of the PA3825<sup>EAL</sup> pGpG/Mn<sup>2+</sup> complex, displayed at 5.0  $\sigma$  (dark blue) and 3.0  $\sigma$  (light blue). Statistics displayed in Table 1.
